# Supplementary material
Source: PubMed Central journal article supplement (PMC2765089)
Supplement: 0906655106_ST1_PDF.pdf [file 0906655106_ST1_PDF.pdf]

**Table S1. Parameters resulting from the QM/MM studies.** The distances (d, in angstroms), angles ( $\angle$ , in degrees) and Mulliken charges (q) are associated with the optimized structures of the superoxo intermediate, peroxy transition state and ferryl intermediate shown in Figs. 6A and S4a, in their singlet spin states.  $E_a$  and  $\Delta E$  (in kcal/mol) are the activation energies and total reaction energies associated with the superoxo + L-Trp  $\rightarrow$  ferryl + indole 2-3-epoxide reaction along the singlet reaction coordinate; those associated with the triplet reaction are included in parentheses as comparisons. The subscripts “p” and “t” on the oxygen atoms refer to the proximal and terminal atom, respectively.  $C_{2,Trp}$  and  $H_{Trp}$  stand for the  $C_2$  atom and the indoleamine H atom, respectively, of the substrate;  $N_{\epsilon,H55}$  stands for the  $N_{\epsilon}$  atom of the H55 residue of xcTDO.

|                                            | hIDO     |              |        | xcTDO    |               |        |
|--------------------------------------------|----------|--------------|--------|----------|---------------|--------|
|                                            | Superoxo | Peroxo       | Ferryl | Superoxo | Peroxo        | Ferryl |
| d Fe-O <sub>p</sub>                        | 1.858    | 1.876        | 1.668  | 1.772    | 1.810         | 1.667  |
| d O <sub>p</sub> -O <sub>t</sub>           | 1.312    | 1.416        | 2.834  | 1.313    | 1.476         | 2.738  |
| $\angle$ Fe-O <sub>p</sub> -O <sub>t</sub> | 121.0    | 122.6        | 150.6  | 124.1    | 121.5         | 149.7  |
| q O <sub>2</sub>                           | -0.377   | -0.563       | -      | -0.371   | -0.541        | -      |
| q Trp-O <sub>t</sub> <sup>a</sup>          | -        | 0.112        | 0.064  | -        | -0.033        | -0.060 |
| q Fe-O <sub>p</sub> <sup>b</sup>           | -        | -0.114       | -0.068 | -        | 0.035         | 0.058  |
| d N $_{\epsilon,H55}$ -H <sub>Trp</sub>    | -        | -            | -      | 1.673    | 1.697         | 1.642  |
| d C <sub>2,Trp</sub> -O <sub>t</sub>       | 2.848    | 1.755        | 1.486  | 2.685    | 1.636         | 1.484  |
| $E_a$                                      |          | 15.5 (13.8)  |        |          | 11.2 (8.1)    |        |
| $\Delta E$                                 |          | -9.2 (-16.2) |        |          | -12.1 (-21.7) |        |

a. The total Mulliken charge including Trp and O<sub>t</sub>; for TDO the Mulliken charge on H55 is also included.

b. The total Mulliken charge including Fe, O<sub>p</sub>, porphyrin and proximal histidine heme ligand.
